# Supplementary material
Source: PubMed Central journal article supplement (PMC6942212)
Supplement: NIHMS1541561-supplement-2.pdf [file NIHMS1541561-supplement-2.pdf]

Supplementary Figure 2

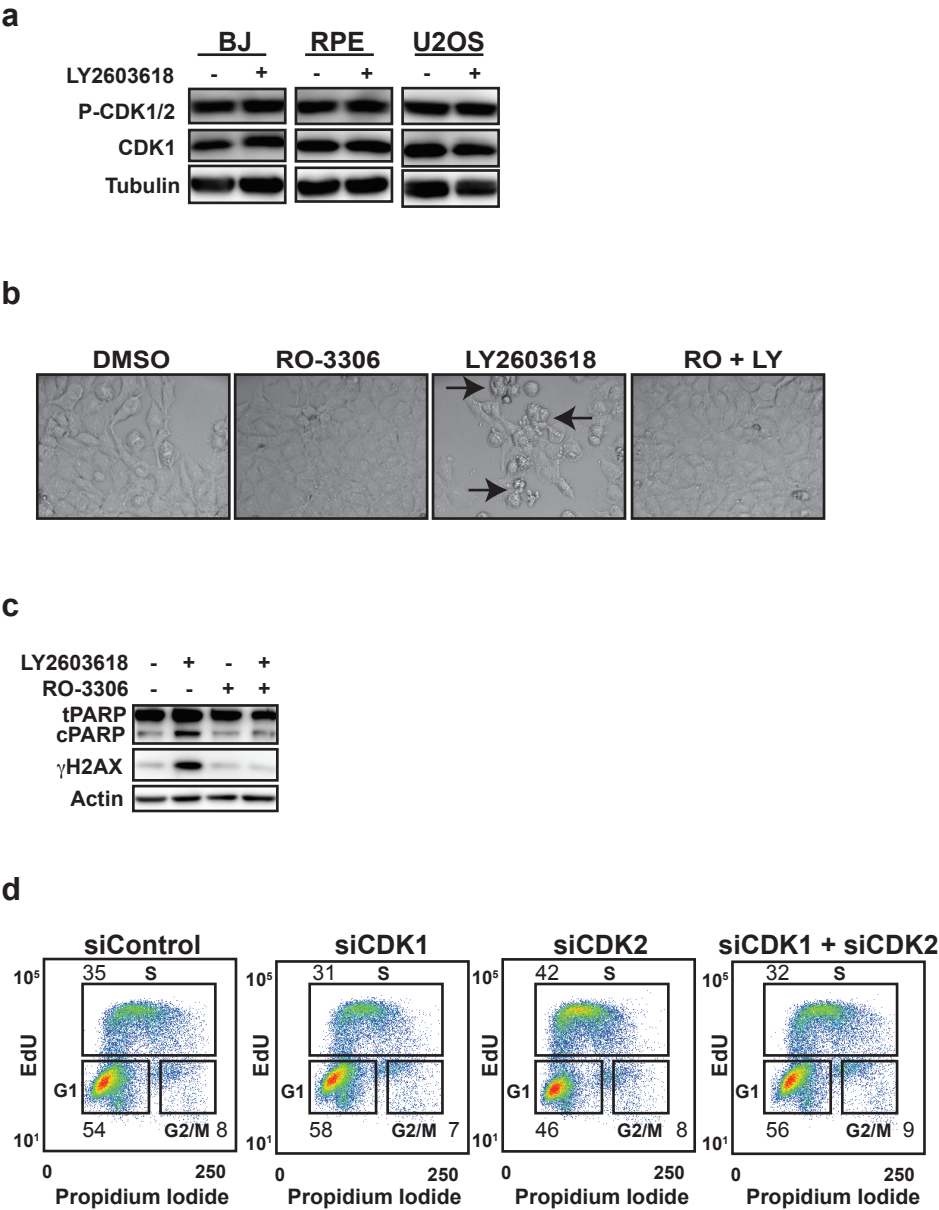

Supplementary Figure 2. (A) BJ-tert, RPE-tert, and U2OS cells were released from a thymidine double block in the presence of LY2603618 (1  $\mu$ M) or DMSO. Cellular lysates were harvested 4 h after release from the block and probed for CDK1/2 phosphorylation by immunoblotting. (B) EW8 cells were released from a thymidine double block in the presence of LY2603618 (1  $\mu$ M), RO-3306 (10  $\mu$ M), or the combination of LY2603618 and RO-3306. Photographs of the cells were taken 4 h after release from the block. Arrows indicate apoptotic and dying cells. (C) TC32 cells were released from a thymidine double block in the presence of LY2603618 (1  $\mu$ M), RO-3306 (10  $\mu$ M), or the combination of LY2603618 and RO-3306 for 4 h. Cellular lysates were then collected for immunoblotting. (D) Cell cycle analysis (EdU and propidium iodide) was performed 24 h after transfection of EW8 cells with siRNA targeting CDK1, CDK2, or CDK1 and CDK2. Results are representative of two independent experiments.
